# Supplementary material for: Kinetic profile and urinary excretion of phenyl-γ-valerolactones upon consumption of cranberry: a dose–response relationship
Source: Royal Society of Chemistry journal article supplement (doi:10.1039/d0fo00806k), 2020-01-01
Supplement: d0fo00806k1.pdf [file d0fo00806k1.pdf]

**Electronic Supplementary Information (ESI)**

**Kinetic profile and urinary excretion of phenyl- $\gamma$ -valerolactones upon consumption of  
cranberry: a dose-response relationship**

Claudia Favari<sup>1</sup>, Pedro Mena<sup>1</sup>, Claudio Curti<sup>2</sup>, Geoffrey Istaş<sup>3</sup>, Christian Heiss<sup>4</sup>, Daniele Del Rio<sup>5</sup>,  
<sup>6,\*</sup>, Ana Rodriguez-Mateos<sup>3,\*</sup>

<sup>1</sup> Human Nutrition Unit, Department of Food & Drug, University of Parma, Parma, Italy

<sup>2</sup> Department of Food & Drug, University of Parma, Parma, Italy

<sup>3</sup> Department of Nutritional Sciences, Faculty of Life Sciences and Medicine, King's College  
London, London, UK

<sup>4</sup> Department of Clinical and Experimental Medicine, Faculty of Health and Medical Sciences,  
University of Surrey, Guildford, UK

<sup>5</sup> Human Nutrition Unit, Department of Veterinary Science, University of Parma, Parma, Italy

<sup>6</sup> School of Advanced Studies on Food and Nutrition, University of Parma, Parma, Italy

\* Corresponding authors: Via Volturno 39, 43125 Parma, Italy; Tel.: +39 0521-903841; E-mail:  
daniele.delrio@unipr.it; Franklin Wilkins Building, 150 Stamford Street, SE1 9NH London, UK;  
Tlf: +44 20 7848 4349; E-mail: ana.rodriguez-mateos@kcl.ac.uk

20 **Supplementary Figure 1e-n.** Pharmacokinetic profile of 5-phenyl- $\gamma$ -valerolactone-3'-sulfate (**e**),  
21 5-phenyl- $\gamma$ -valerolactone-4'-sulfate (**f**), 5-phenyl- $\gamma$ -valerolactone-3'-glucuronide (**g**), 5-phenyl- $\gamma$ -  
22 valerolactone-4'-glucuronide (**h**), 5-(5'-hydroxyphenyl)- $\gamma$ -valerolactone-3'-sulfate (**i**), 5-(5'-  
23 hydroxyphenyl)- $\gamma$ -valerolactone-3'-glucuronide (**j**), 5-phenyl- $\gamma$ -valerolactone-methoxy-sulfate  
24 (3',4') isomer 1 (**k**), 5-phenyl- $\gamma$ -valerolactone-methoxy-sulfate (3',4') isomer 2 (**l**), 5-phenyl- $\gamma$ -  
25 valerolactone-methoxy-glucuronide isomer (3',4') (**m**) and 5-phenyl- $\gamma$ -valerolactone-sulfate-  
26 glucuronide isomer (3',4') (**n**) for the different treatments. Data are expressed as nM, mean  $\pm$  SEM  
27 (n=10). Treatment 0 TF corresponds to the control drink, other treatments to cranberry juice drinks  
28 with growing amounts of total flavan-3-ols.  
29

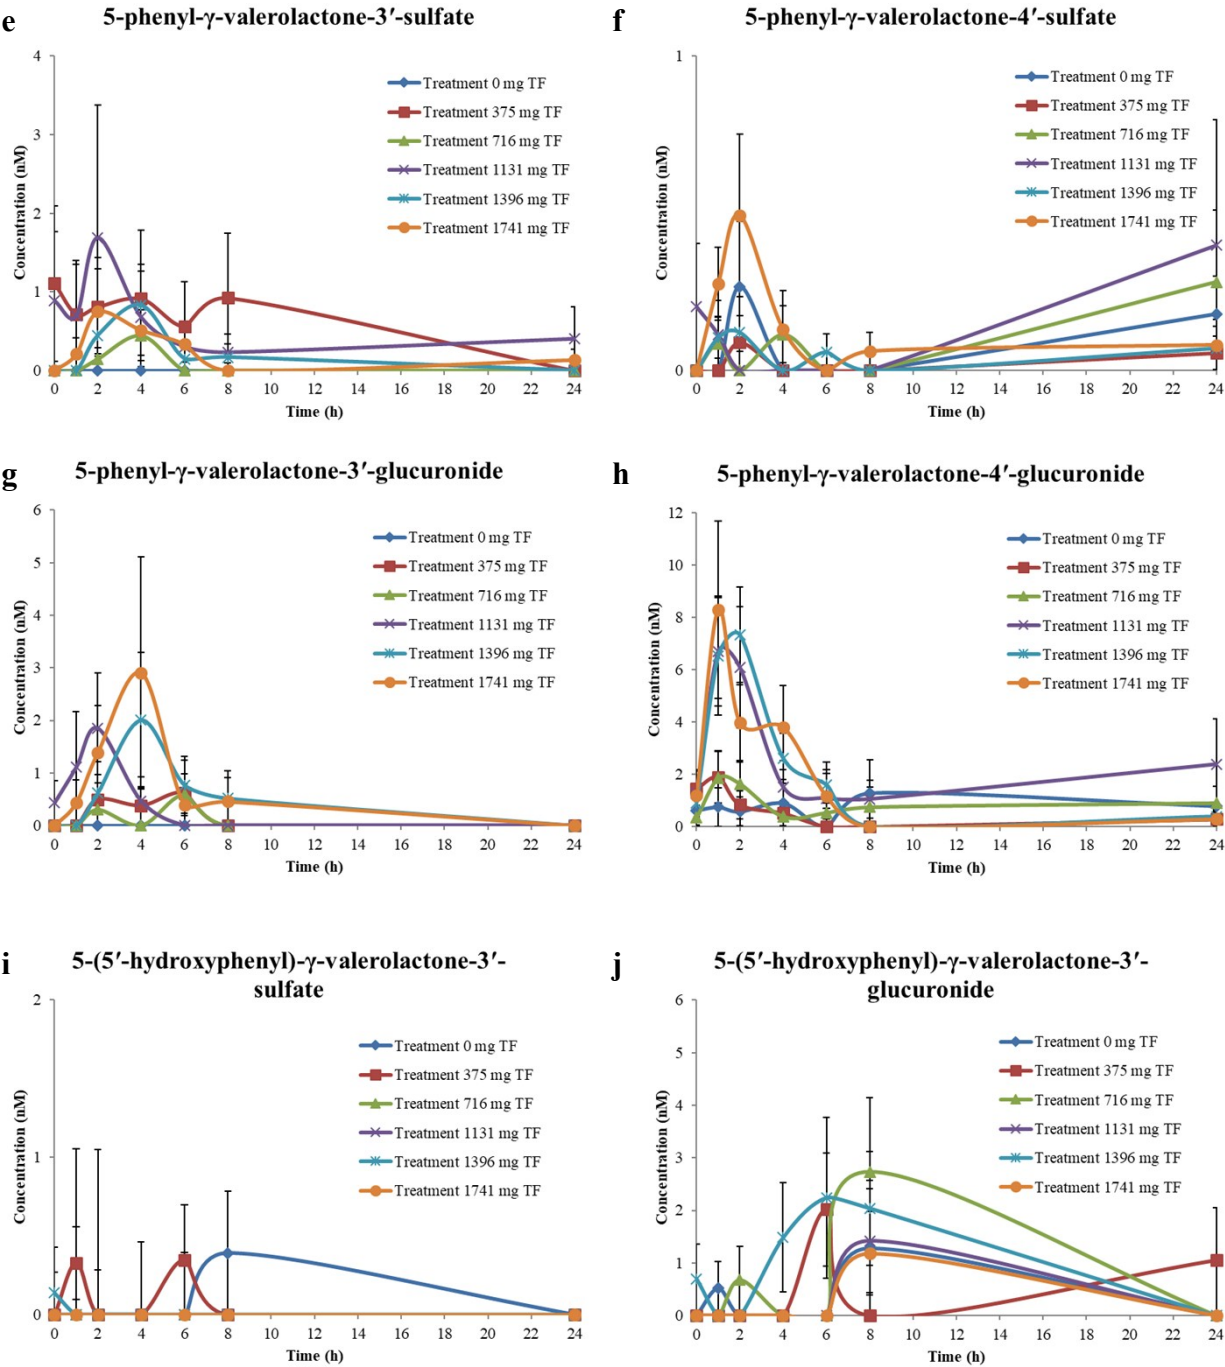

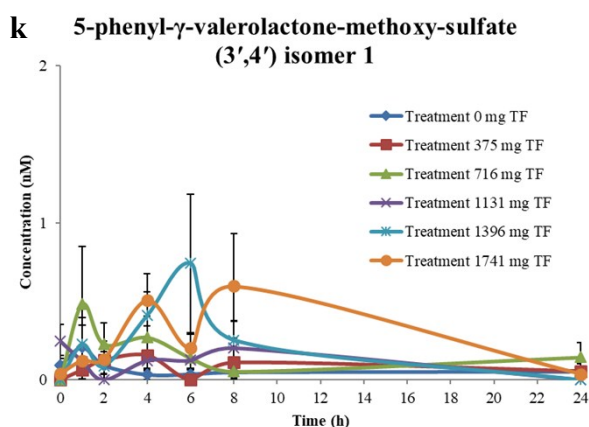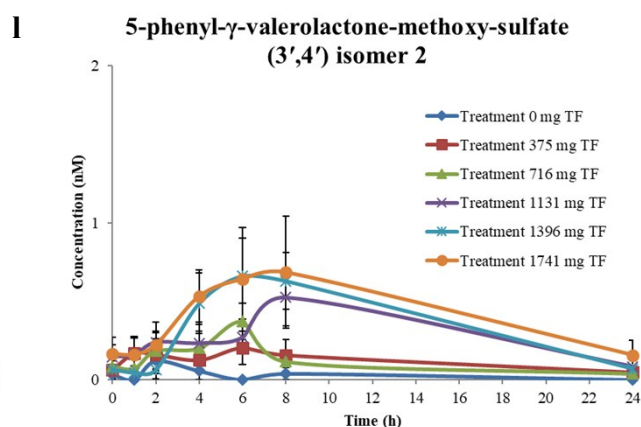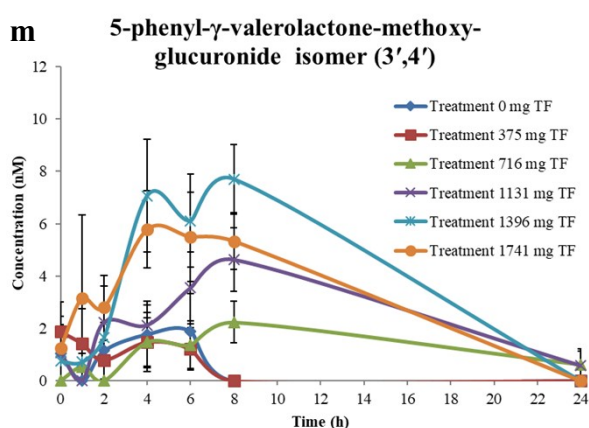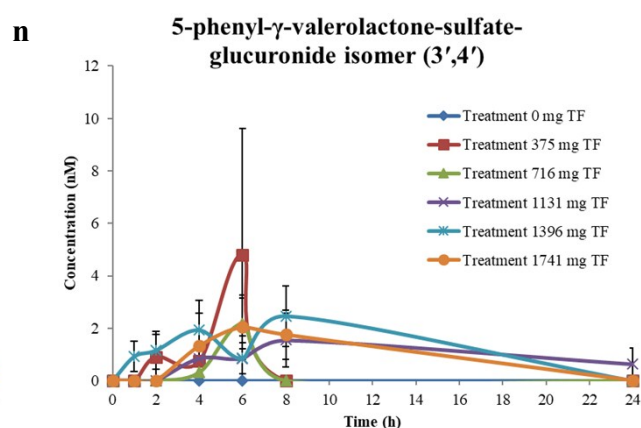

34

35

36

37 **Supplementary Figure 2a-n.** Cumulative urinary excretion profile of 5-phenyl- $\gamma$ -valerolactone-  
 38 3'-sulfate (a), 5-phenyl- $\gamma$ -valerolactone-3'-glucuronide (b), 5-phenyl- $\gamma$ -valerolactone-4'-  
 39 glucuronide (c), 5-(3',4'-dihydroxyphenyl)- $\gamma$ -valerolactone (d), 5-(hydroxyphenyl)- $\gamma$ -  
 40 valerolactone-sulfate (3',4' isomers) (e), 5-(5'-hydroxyphenyl)- $\gamma$ -valerolactone-3'-sulfate (f), 5-(4'-  
 41 hydroxyphenyl)- $\gamma$ -valerolactone-3'-glucuronide (g), 5-(3'-hydroxyphenyl)- $\gamma$ -valerolactone-4'-  
 42 glucuronide (h), 5-(5'-hydroxyphenyl)- $\gamma$ -valerolactone-3'-glucuronide (i), 5-phenyl- $\gamma$ -  
 43 valerolactone-methoxy-sulfate (3',4') isomer 1 (j), 5-phenyl- $\gamma$ -valerolactone-methoxy-sulfate  
 44 (3',4') isomer 2 (k), 5-phenyl- $\gamma$ -valerolactone-methoxy-glucuronide isomer (3',4') (l), 5-phenyl- $\gamma$ -  
 45 valerolactone-sulfate-glucuronide isomer (3',4') (m) and of the sum of quantified PVLs (n) for the  
 46 different treatments. Data are expressed as  $\mu\text{mol}$ , mean  $\pm$  SEM (n=10). Treatment 0 TF corresponds  
 47 to the control drink, other treatments to cranberry juice drinks with growing amounts of total  
 48 flavan-3-ols.

49

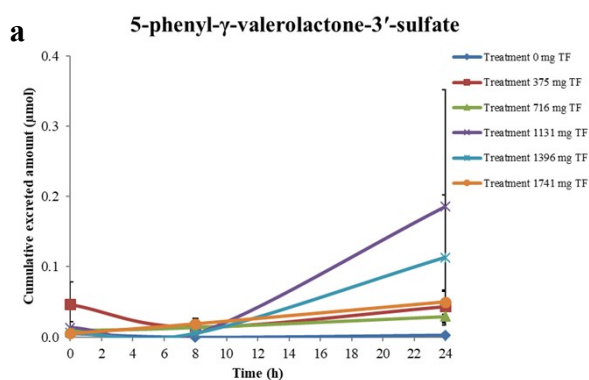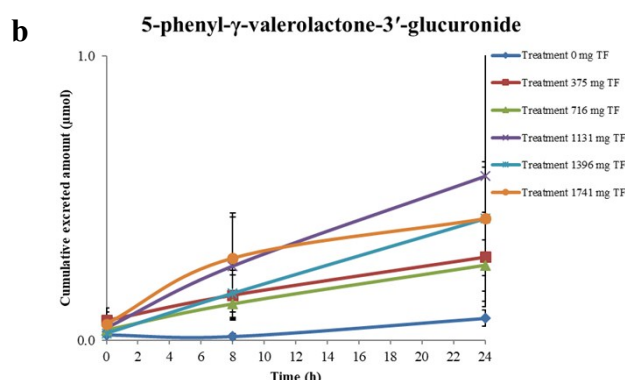

50

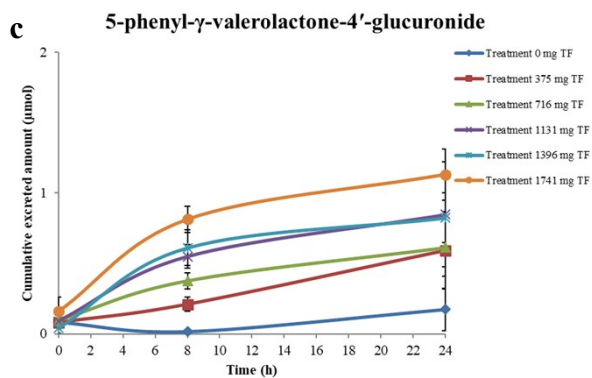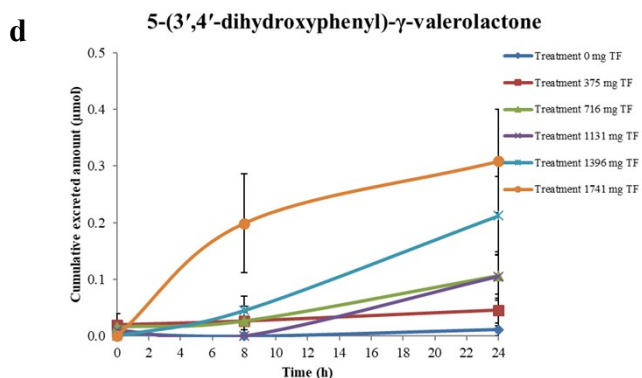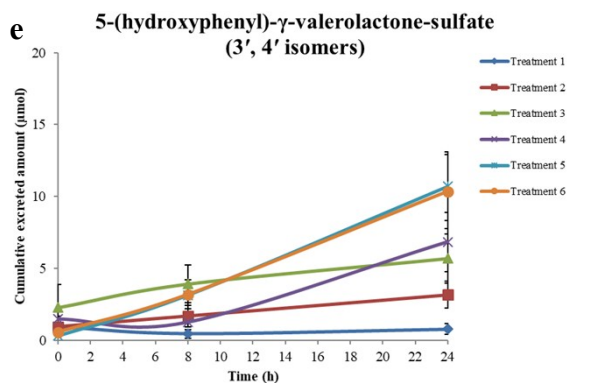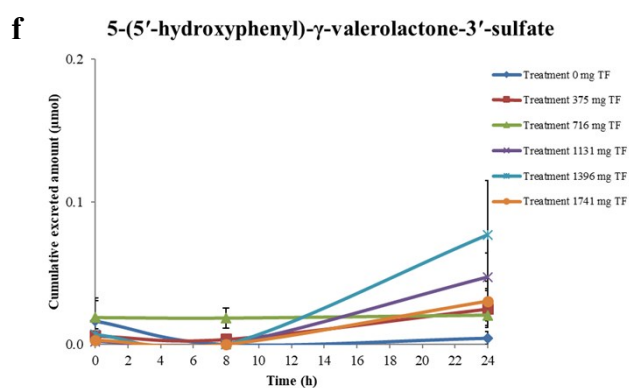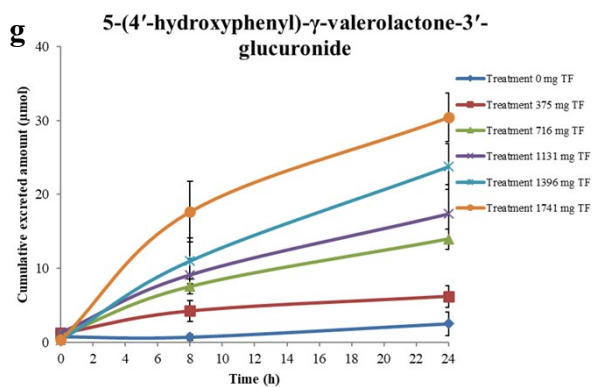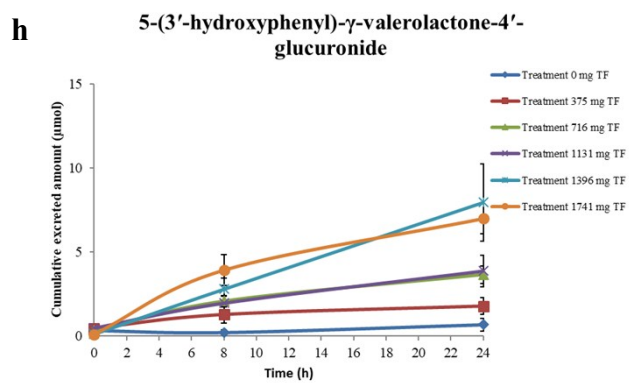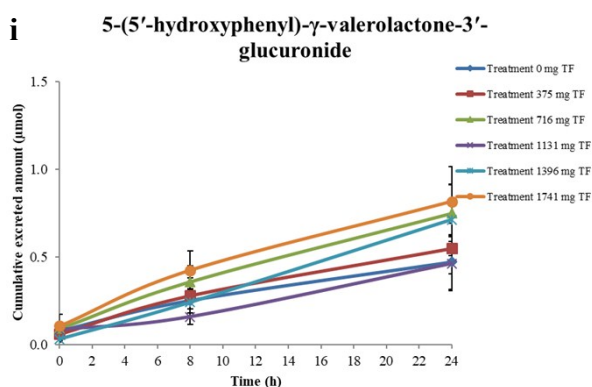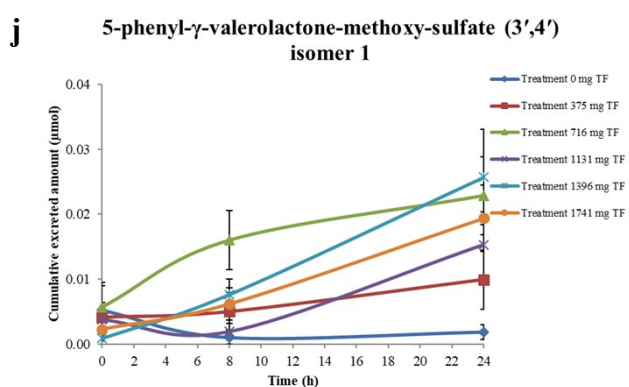

**k** 5-phenyl- $\gamma$ -valerolactone-methoxy-sulfate (3',4') isomer 2

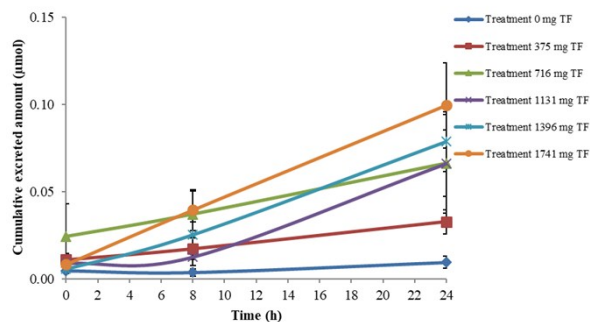

**l** 5-phenyl- $\gamma$ -valerolactone-methoxy-glucuronide isomer (3',4')

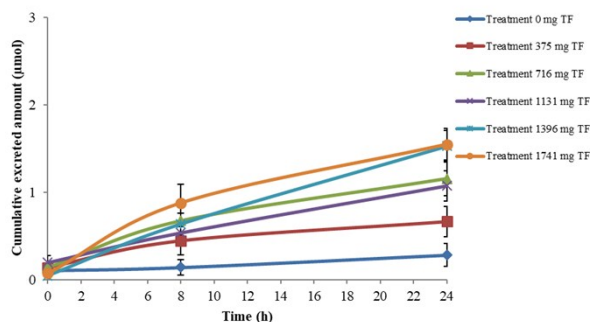

**m** 5-phenyl- $\gamma$ -valerolactone-sulfate-glucuronide isomer (3',4')

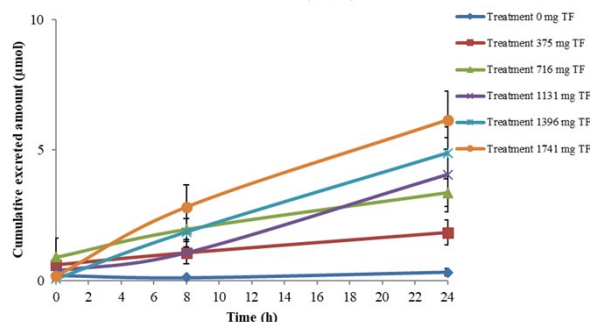

**n** TOTAL

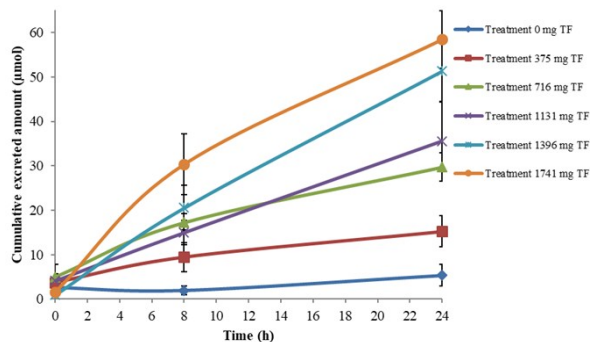

**Table S1.** Individual dose-response relation between (a) total amount of ingested flavan-3-ols and Area under the curve (AUC) of the concentration in plasma of PVLs over 24h and (b) total amount of ingested flavan-3-ols and cumulative quantity of excreted PVLs in urine.

**a**

| Subject    | Equation               | R <sup>2</sup> |
|------------|------------------------|----------------|
| All (n=10) | $y = 2.2575x + 113.07$ | 0.981          |
| 1          | $y = 4.1603x + 183.67$ | 0.785          |
| 2          | $y = 2.5589x + 425.06$ | 0.949          |
| 3          | $y = 2.0872x + 421.29$ | 0.789          |
| 4          | $y = 2.2223x - 102.44$ | 0.976          |
| 5          | $y = 1.1354x + 228.06$ | 0.788          |
| 6          | $y = 1.4211x + 184.62$ | 0.961          |
| 7          | $y = 2.2859x - 107.54$ | 0.920          |
| 8          | $y = 1.962x - 123.01$  | 0.852          |
| 9          | $y = 0.5098x + 395.69$ | 0.310          |
| 10         | $y = 4.2317x - 374.7$  | 0.985          |

| <b>Subject</b>    | <b>Equation</b>        | <b>R<sup>2</sup></b> |
|-------------------|------------------------|----------------------|
| <b>All (n=10)</b> | $y = 0.031x + 4.9335$  | 0.982                |
| <b>1</b>          | $y = 0.0345x + 2.4507$ | 0.816                |
| <b>2</b>          | $y = 0.0436x - 3.4747$ | 0.785                |
| <b>3</b>          | $y = 0.0366x + 10.938$ | 0.799                |
| <b>4</b>          | $y = 0.0263x + 5.7057$ | 0.767                |
| <b>5</b>          | $y = 0.0235x + 0.3171$ | 0.794                |
| <b>6</b>          | $y = 0.05x + 4.1262$   | 0.669                |
| <b>7</b>          | $y = 0.0488x - 4.7871$ | 0.878                |
| <b>8</b>          | $y = 0.0363x - 5.895$  | 0.890                |
| <b>9</b>          | $y = 0.0139x + 3.6589$ | 0.414                |
| <b>10</b>         | $y = 0.0057x + 18.91$  | 0.453                |
